# Supplementary material
Source: PubMed Central journal article supplement (PMC6754490)
Supplement: 12264_2019_397_MOESM1_ESM.pdf [file 12264_2019_397_MOESM1_ESM.pdf]

Supplementary Materials

A

*C57BL/6J* mice LDT injected

Day 1

AAV-CAG-Dio-TVA-eGFP

AAV-CAG-Dio-RG

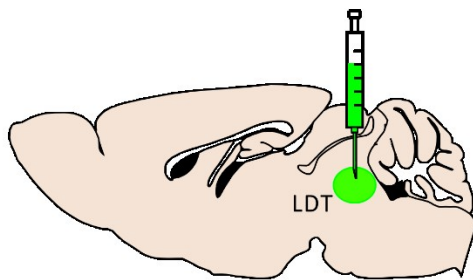

Day 21

RV-EvnA-DsRed

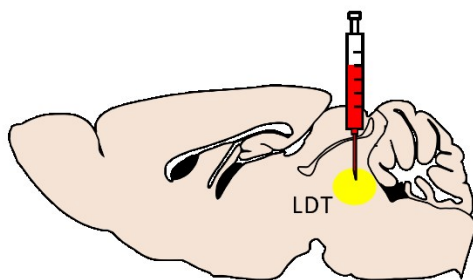

Day 28

Perfused imaging

B

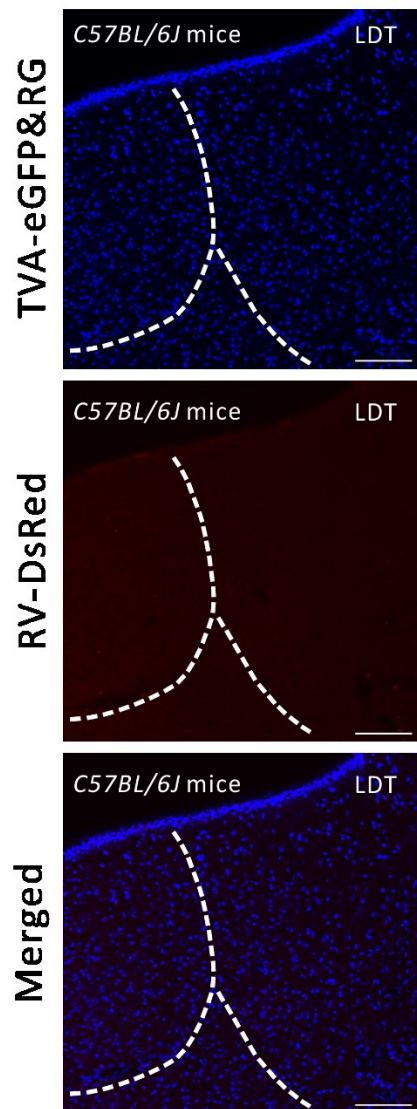

Supplementary Figure 1, Control experiment demonstrating specificity of retrograde trans-synaptic tracing approach.

A, Timeline of virus injection into the LDT of wild-type mice for retrograde trans-synaptic tracing. The experiment is related to Figure 1 A.

B, Representative confocal images of LDT neurons in wild-type mice. No evidence of TVA-eGFP or RV-DsRed fluorescence positive cells was observed.

# Abbreviations

|              |                                                   |
|--------------|---------------------------------------------------|
| <b>AI</b>    | <b>agranular insular cortex</b>                   |
| <b>BST</b>   | <b>bed nucleus of the stria terminalis</b>        |
| <b>Ce</b>    | <b>central amygdaloid nucleus</b>                 |
| <b>CG</b>    | <b>central gray</b>                               |
| <b>Cg</b>    | <b>cingulate cortex</b>                           |
| <b>CIC</b>   | <b>central nucleus of the inferior colliculus</b> |
| <b>CnF</b>   | <b>cuneiform nucleus</b>                          |
| <b>DMTg</b>  | <b>dorsomedial tegmental area</b>                 |
| <b>DR</b>    | <b>dorsal raphe nucleus</b>                       |
| <b>DTg</b>   | <b>dorsal tegmental nucleus</b>                   |
| <b>DpMe</b>  | <b>deep mesencephalic nucleus</b>                 |
| <b>IP</b>    | <b>interpeduncular nucleus</b>                    |
| <b>LHb</b>   | <b>lateral habenular nucleus</b>                  |
| <b>LH</b>    | <b>lateral hypothalamic area</b>                  |
| <b>LO</b>    | <b>lateral orbital cortex</b>                     |
| <b>LPAG</b>  | <b>lateral periaqueductal gray</b>                |
| <b>LPB</b>   | <b>lateral parabrachial nucleus</b>               |
| <b>LDT</b>   | <b>laterodorsal tegmental nucleus</b>             |
| <b>M</b>     | <b>motor cortex</b>                               |
| <b>MnR</b>   | <b>median raphe nucleus</b>                       |
| <b>MO</b>    | <b>medial orbital cortex</b>                      |
| <b>MPA</b>   | <b>medial preoptic area</b>                       |
| <b>PAG</b>   | <b>periaqueductal gray</b>                        |
| <b>PH</b>    | <b>posterior hypothalamic area</b>                |
| <b>PnC</b>   | <b>pontine reticular nucleus, caudal part</b>     |
| <b>PnO</b>   | <b>pontine reticular nucleus, oral part</b>       |
| <b>PrL</b>   | <b>prelimbic cortex</b>                           |
| <b>PtA</b>   | <b>parietal association cortex</b>                |
| <b>PPTg</b>  | <b>pedunculopontine tegmental nucleus</b>         |
| <b>RS</b>    | <b>retrosplenial cortex</b>                       |
| <b>S</b>     | <b>somatosensory cortex</b>                       |
| <b>SC</b>    | <b>superior colliculus</b>                        |
| <b>SN</b>    | <b>substantia nigra</b>                           |
| <b>VLPAG</b> | <b>ventrolateral periaqueductal gray</b>          |
| <b>VO</b>    | <b>ventral orbital cortex</b>                     |
| <b>VTA</b>   | <b>ventral tegmental area</b>                     |
| <b>ZI</b>    | <b>zona incerta</b>                               |

Supplementary Figure 2, List of structures in Figure 2 to Figure 8.

A

|       | VGLUT2-Cre | CHAT-Cre | PV-Cre | SST-cre |
|-------|------------|----------|--------|---------|
| AcbSh | ✓          |          | ✓      | ✓       |
| AHP   | ✓          | ✓        | ✓      | ✓       |
| APT   | ✓          | ✓        |        |         |
| CPU   | ✓          | ✓        | ✓      |         |
| DLPAG | ✓          | ✓        | ✓      | ✓       |
| DM    | ✓          | ✓        | ✓      | ✓       |
| Eth   |            |          |        | ✓       |
| IL    | ✓          |          |        |         |
| LC    | ✓          | ✓        | ✓      | ✓       |
| LM    | ✓          |          | ✓      | ✓       |
| LPO   | ✓          | ✓        |        | ✓       |
| MM    | ✓          | ✓        |        |         |
| MPO   | ✓          | ✓        | ✓      | ✓       |
| PF    | ✓          | ✓        | ✓      | ✓       |
| PVA   |            |          | ✓      |         |
| PoT   | ✓          |          |        |         |
| VDB   | ✓          | ✓        | ✓      | ✓       |
| VMH   | ✓          | ✓        | ✓      | ✓       |
| VP    | ✓          | ✓        | ✓      | ✓       |

B

### Abbreviations

|       |                                                   |
|-------|---------------------------------------------------|
| AcbSh | accumbens nucleus, shell                          |
| AHP   | anterior hypothalamic area, posterior part        |
| APT   | anterior pretecal nucleus                         |
| CPU   | caudate putamen                                   |
| DLPAG | dorsolateral periaqueductal gray                  |
| DM    | dorsomedial hypothalamic nucleus                  |
| Eth   | ethmoid thalamic nucleus                          |
| IL    | infralimbic cortex                                |
| LC    | locus coeruleus                                   |
| LM    | lateral mammillary nucleus                        |
| LPO   | lateral preoptic area                             |
| MM    | medial mammillary nucleus, medial part            |
| MPO   | medial preoptic nucleus                           |
| PF    | parafascicular thalamic nucleus                   |
| PVA   | paraventricular thalamic nucleus, anterior part   |
| PoT   | posterior thalamic nuclear group, triangular part |
| VDB   | nucleus of the vertical limb of the diagonal band |
| VMH   | ventromedial hypothalamic nucleus                 |
| VP    | ventral pallidum                                  |

Supplementary Figure 3, List of brain areas or subareas which accounted for <1% of total inputs.

| Data         | Statistical test    | p value | Multiple comparisons                                                                                                                                                                                                                                             |
|--------------|---------------------|---------|------------------------------------------------------------------------------------------------------------------------------------------------------------------------------------------------------------------------------------------------------------------|
| Figure 1C    | One-way ANOVA       | 0.5299  | —                                                                                                                                                                                                                                                                |
| Figure 6A    |                     |         |                                                                                                                                                                                                                                                                  |
| Cortex       | One-way ANOVA       | 0.006   | Turkey's multiple comparisons test : VGLUT2-Cre vs CHAT-Cre p=0.016<br>VGLUT2-Cre vs PV-Cre p=0.007<br>VGLUT2-Cre vs SST-Cre p=0.029<br>CHAT-Cre vs PV-Cre p=0.955<br>CHAT-Cre vs SST-Cre p=0.986<br>PV-Cre vs SST-Cre p=0.831                                   |
| Thalamic     | Kruskal-Wallis test | 0.0386  | Dunn's multiple comparisons test : VGLUT2-Cre vs CHAT-Cre adj. p=0.1051<br>VGLUT2-Cre vs PV-Cre adj. p=0.1879<br>VGLUT2-Cre vs SST-Cre adj. p>0.9999<br>CHAT-Cre vs PV-Cre adj. p>0.9999<br>CHAT-Cre vs SST-Cre adj. p=0.7137<br>PV-Cre vs SST-Cre adj. p>0.9999 |
| Hypothalamic | One-way ANOVA       | <0.0001 | Turkey's multiple comparisons test : VGLUT2-Cre vs CHAT-Cre p<0.0001<br>VGLUT2-Cre vs PV-Cre p<0.0001<br>VGLUT2-Cre vs SST-Cre p=0.088<br>CHAT-Cre vs PV-Cre p=0.927<br>CHAT-Cre vs SST-Cre p=0.012<br>PV-Cre vs SST-Cre p=0.04                                  |
| Midbrain     | One-way ANOVA       | 0.395   | —                                                                                                                                                                                                                                                                |
| Hindbrain    | One-way ANOVA       | 0.023   | Turkey's multiple comparisons test : VGLUT2-Cre vs CHAT-Cre p=0.283<br>VGLUT2-Cre vs PV-Cre p=0.014<br>VGLUT2-Cre vs SST-Cre p=0.309<br>CHAT-Cre vs PV-Cre p=0.309<br>CHAT-Cre vs SST-Cre p>0.9999<br>PV-Cre vs SST-Cre p=0.283                                  |
| Figure 7A    |                     |         |                                                                                                                                                                                                                                                                  |
| M            | One-way ANOVA       | 0.027   | Turkey's multiple comparisons test : VGLUT2-Cre vs CHAT-Cre p=0.055<br>VGLUT2-Cre vs PV-Cre p=0.029<br>VGLUT2-Cre vs SST-Cre p=0.349<br>CHAT-Cre vs PV-Cre p=0.983<br>CHAT-Cre vs SST-Cre p=0.649<br>PV-Cre vs SST-Cre p=0.443                                   |
| Prl          | Kruskal-Wallis test | 0.0786  | —                                                                                                                                                                                                                                                                |
| VO           | Kruskal-Wallis test | 0.0003  | Dunn's multiple comparisons test : VGLUT2-Cre vs CHAT-Cre adj. p=0.0082<br>VGLUT2-Cre vs PV-Cre adj. p=0.2663<br>VGLUT2-Cre vs SST-Cre adj. p>0.9999<br>CHAT-Cre vs PV-Cre adj. p>0.9999<br>CHAT-Cre vs SST-Cre adj. p=0.0841<br>PV-Cre vs SST-Cre adj. p>0.9999 |
| Cg           | Kruskal-Wallis test | 0.0169  | Dunn's multiple comparisons test : VGLUT2-Cre vs CHAT-Cre adj. p=0.0288<br>VGLUT2-Cre vs PV-Cre adj. p=0.7137<br>VGLUT2-Cre vs SST-Cre adj. p=0.1879<br>CHAT-Cre vs PV-Cre adj. p>0.9999<br>CHAT-Cre vs SST-Cre adj. p>0.9999<br>PV-Cre vs SST-Cre adj. p>0.9999 |
| S            | One-way ANOVA       | 0.093   | —                                                                                                                                                                                                                                                                |
| RS           | One-way ANOVA       | 0.584   | —                                                                                                                                                                                                                                                                |
| LO           | One-way ANOVA       | 0.066   | —                                                                                                                                                                                                                                                                |
| PtA          | Kruskal-Wallis test | 0.1309  | —                                                                                                                                                                                                                                                                |
| MO           | Kruskal-Wallis test | 0.0215  | Dunn's multiple comparisons test : VGLUT2-Cre vs PV-Cre adj. p=0.0423<br>VGLUT2-Cre vs SST-Cre adj. p>0.9999<br>PV-Cre vs SST-Cre adj. p=0.1485                                                                                                                  |
| Al           | Kruskal-Wallis test | 0.0173  | Dunn's multiple comparisons test : VGLUT2-Cre vs PV-Cre adj. p=0.0418<br>VGLUT2-Cre vs SST-Cre adj. p=0.0734<br>PV-Cre vs SST-Cre adj. p>0.9999                                                                                                                  |
| Figure 8C    | Kruskal-Wallis test | 0.0024  | Dunn's multiple comparisons test : VGLUT2-Cre vs CHAT-Cre adj. p=0.3806<br>VGLUT2-Cre vs PV-Cre adj. p=0.0085<br>VGLUT2-Cre vs SST-Cre adj. p>0.9999<br>CHAT-Cre vs PV-Cre adj. p>0.9999<br>CHAT-Cre vs SST-Cre adj. p>0.9999<br>PV-Cre vs SST-Cre adj. p=0.2701 |
| Figure 8D    | One-way ANOVA       | 0.092   | —                                                                                                                                                                                                                                                                |

Supplementary Table 1, Details of the statistical analysis.
